# Supplementary material for: Effective Isolation and Characterization of Mycobacteriophages with the Ability to Lyse Mycobacterium avium subsp. paratuberculosis
Source: MDPI journal article supplement (doi:10.3390/v16010020), 2023-12-22
Supplement: s1 [file s1]

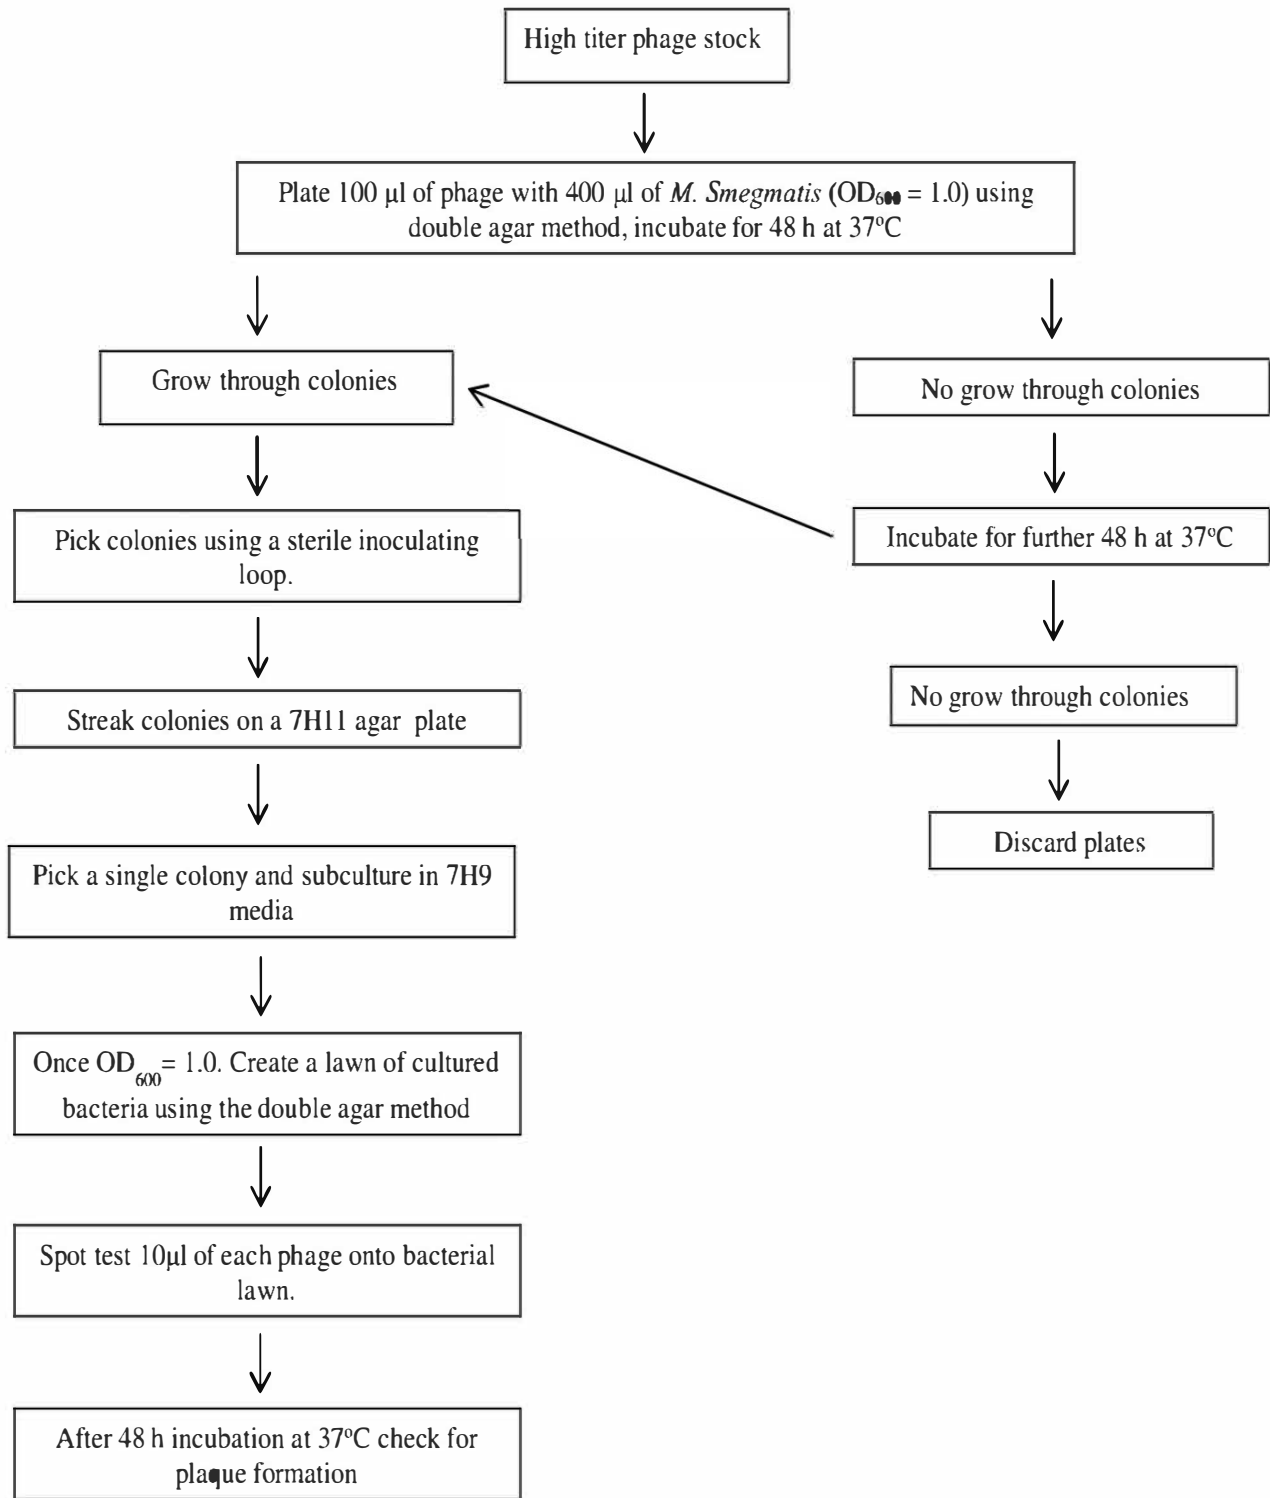

**Figure S1.** Flow chart illustrating the protocol to produce resistance bacterial strains and test their susceptibility to mbps

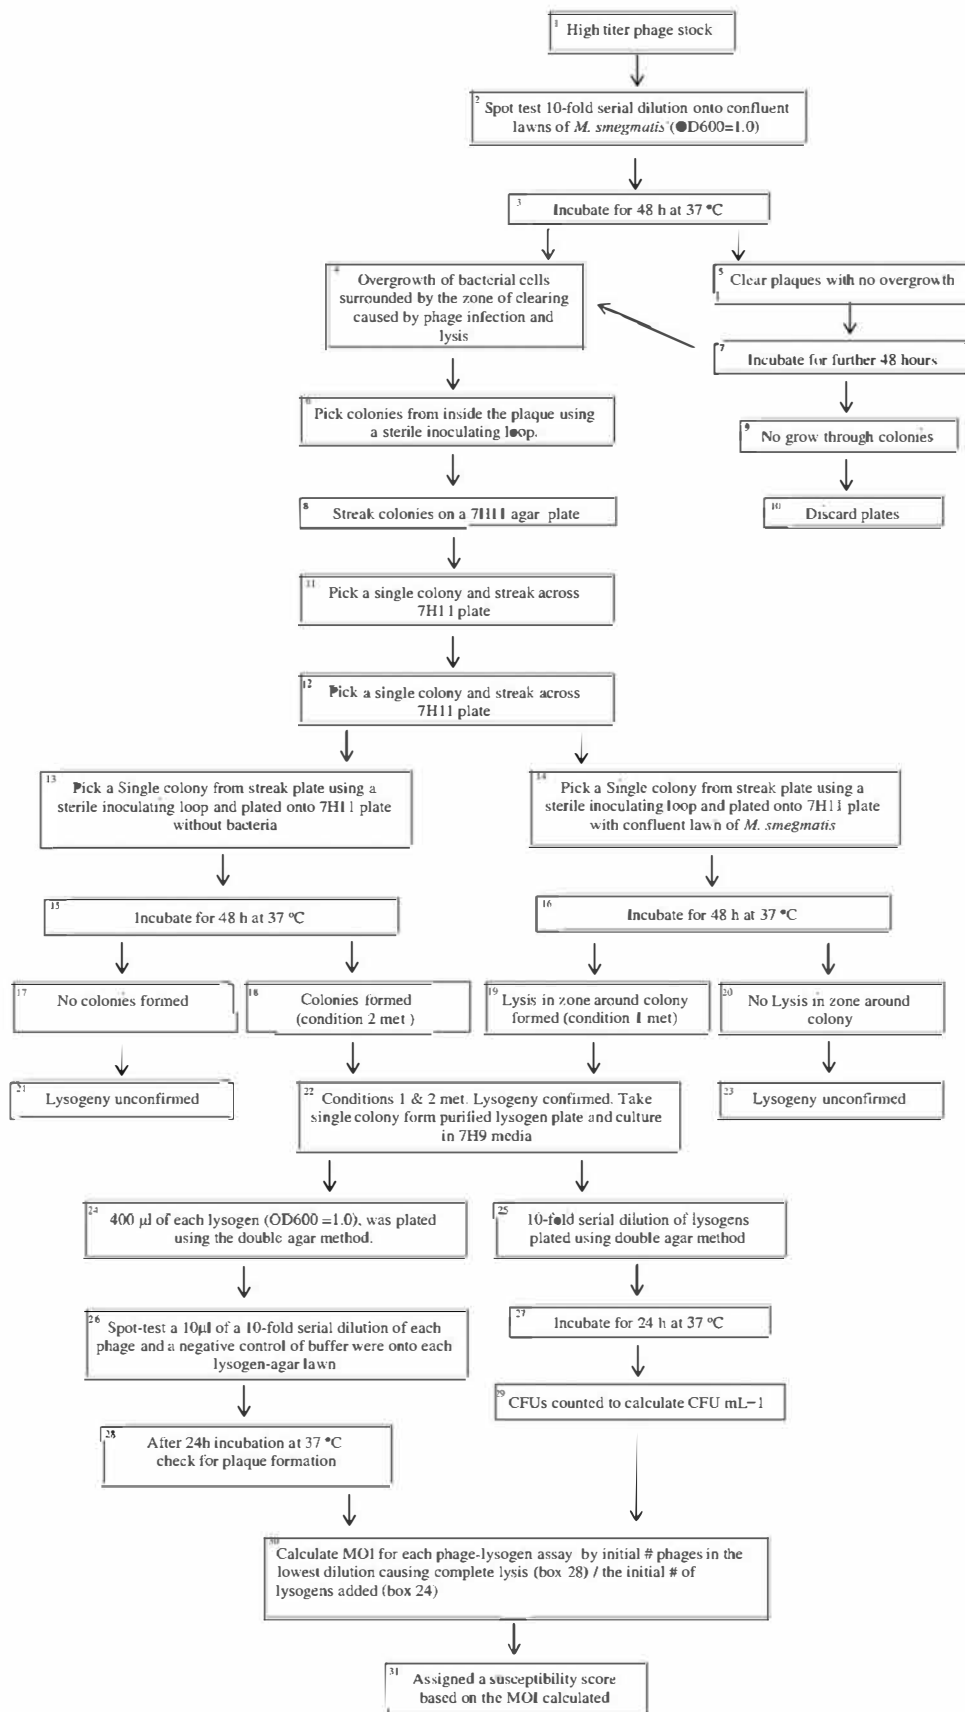

**Figure S2.** Flow chart illustrating the protocol to produce lysogens and test their susceptibility to mbps

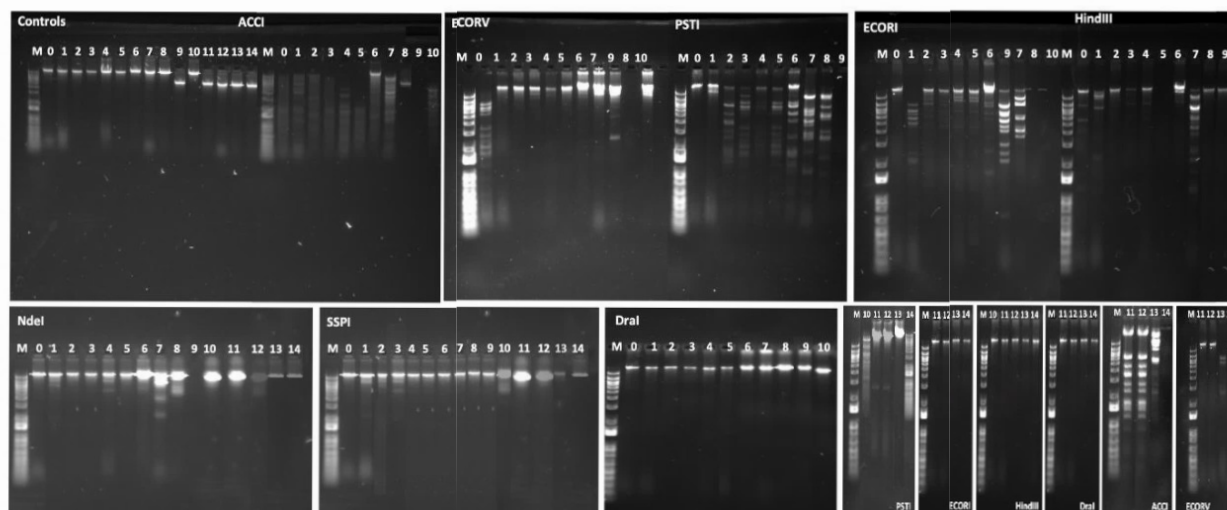

**Figure S3.** Restriction enzyme digest of phages isolated with *M. smegmatis* with 8 different restriction enzymes (AccI, EcoRI, DraI, PstI, HindIII, EcoRV, SspI, NdeI). 0 denotes known mycobacteriophage D29. 1 to 14 represents the mbps isolated from samples. Lane M designates 1 kbp (NEB) ladder as the “marker”.
