# Supplementary material for: Effective Isolation and Characterization of Mycobacteriophages with the Ability to Lyse Mycobacterium avium subsp. paratuberculosis
Source: MDPI journal article supplement (doi:10.3390/v16010020), 2023-12-22
Supplement: s1 [file s1]

**Table S1.** The number of plaque forming units (PFUs) eluted from phage spiked fecal matter as a result of the addition of chemicals compared with number of expected PFUs.

| <b>Treatment</b>        | <b>Final Concentration</b> | <b>PFUS Observed /Expected</b> |
|-------------------------|----------------------------|--------------------------------|
| No supplements          | NA                         | 1/17                           |
| No Phage                | NA                         | 0/0                            |
| Chloroform              | 3 ul/g of sample           | 2/17                           |
| Tween 80                | 0.01 %                     | 5/17                           |
| Tween 40                | 0.01 %                     | 3/17                           |
| Tween 20                | 0.01 %                     | 4/17                           |
| Triton X                | 0.01 %                     | 3/17                           |
| EDTA                    | 0.05 mM                    | 7/17                           |
| Urea                    | 50 mM                      | 3/17                           |
| Calcium Chloride        | 100 mM                     | 3/17                           |
|                         | 200 mM                     | 1/17                           |
|                         | 300 mM                     | 1/17                           |
|                         | 400 mM                     | 0/17                           |
|                         | 500 mM                     | 0/17                           |
| Sodium Chloride         | 100 mM                     | 2/17                           |
|                         | 200 mM                     | 6/17                           |
|                         | 300 mM                     | 5/17                           |
|                         | 400 mM                     | 1/17                           |
|                         | 500 mM                     | 0/17                           |
| Glucose and Maltose mix | 200 mM                     | 0/17                           |
|                         | 200mM                      | 0/17                           |
|                         | 300 mM                     | 0/17                           |
|                         | 400 mM                     | 0/17                           |
|                         | 500 mM                     | 0/17                           |
